# Supplementary material for: Alterations in Gastric Microbiota After H. Pylori Eradication and in Different Histological Stages of Gastric Carcinogenesis
Source: PubMed Central journal article supplement (PMC5359573; doi:10.1038/srep44935), 2017-03-21

## SUPPLEMENTARY TABLES AND FIGURES

### ALTERATIONS IN GASTRIC MICROBIOTA AFTER *H. PYLORI* ERADICATION AND IN DIFFERENT HISTOLOGICAL STAGES OF GASTRIC CARCINOGENESIS

Tung Hiu Li<sup>1</sup>, Youwen Qin<sup>2</sup>, Pak Chung Sham<sup>2</sup>, K.S. Lau<sup>1</sup>, Kent-Man Chu<sup>3</sup>, Wai K. Leung<sup>1\*</sup>

<sup>1</sup>Department of Medicine, The University of Hong Kong, Hong Kong

<sup>2</sup>Centre for Genomic Sciences, The University of Hong Kong, Hong Kong

<sup>3</sup>Department of Surgery, The University of Hong Kong, Hong Kong

**Supplementary Table 1: Patient's samples**

| Study_ID     | Gender | Age | HP_Positive | Disease     | OTUs_Count | Shannon_Index |
|--------------|--------|-----|-------------|-------------|------------|---------------|
| Normal1      | F      | 48  | No          | Normal      | 172        | 4.9633        |
| Normal2      | F      | 54  | No          | Normal      | 193        | 4.5347        |
| Normal3      | M      | 63  | No          | Normal      | 130        | 4.4301        |
| Normal4      | F      | 57  | No          | Normal      | 160        | 4.6102        |
| Normal5      | M      | 40  | No          | Normal      | 109        | 0.3601        |
| Normal6      | F      | 57  | No          | Normal      | 100        | 4.2514        |
| Normal7      | F      | 32  | No          | Normal      | 128        | 4.432         |
| Normal8      | M      | 42  | No          | Normal      | 131        | 4.4909        |
| Gastritis1   | M      | 59  | Yes         | Gastritis   | 191        | 2.9994        |
| Gastritis2   | F      | 33  | Yes         | Gastritis   | 88         | 0.1977        |
| Gastritis3   | F      | 47  | Yes         | Gastritis   | 166        | 0.454         |
| Gastritis4   | F      | 52  | Yes         | Gastritis   | 209        | 2.8965        |
| Gastritis5   | F      | 56  | Yes         | Gastritis   | 87         | 0.2445        |
| Gastritis6   | F      | 54  | Yes         | Gastritis   | 128        | 0.3252        |
| Gastritis7   | F      | 58  | Yes         | Gastritis   | 228        | 0.799         |
| Gastritis8   | M      | 48  | Yes         | Gastritis   | 139        | 0.4143        |
| Gastritis9   | F      | 25  | Yes         | Gastritis   | 72         | 0.2304        |
| IM1_1        | M      | 48  | No          | IM          | 178        | 4.7613        |
| IM1_2        | M      | 48  | No          | IM          | 126        | 4.3518        |
| IM2_1        | F      | 61  | Yes         | IM          | 210        | 2.7762        |
| IM2_2        | F      | 61  | Yes         | IM          | 90         | 0.1785        |
| IM3_1        | F      | 36  | Yes         | IM          | 166        | 0.4707        |
| IM3_2        | F      | 36  | Yes         | IM          | 181        | 3.0559        |
| IM4_1        | F      | 56  | No          | IM          | 119        | 4.3199        |
| IM4_2        | F      | 56  | No          | IM          | 104        | 3.9152        |
| IM5_1        | M      | 70  | Yes         | IM          | 160        | 0.969         |
| IM5_2        | M      | 70  | Yes         | IM          | 148        | 0.5309        |
| IM6_1        | M      | 49  | Yes         | IM          | 153        | 0.9198        |
| IM6_2        | M      | 49  | Yes         | IM          | 78         | 0.0945        |
| IM7_1        | M      | 49  | No          | IM          | 165        | 4.4695        |
| IM7_2        | M      | 49  | No          | IM          | 130        | 4.2714        |
| IM8_1        | F      | 56  | Yes         | IM          | 139        | 0.2054        |
| IM8_2        | F      | 56  | Yes         | IM          | 141        | 0.3339        |
| IM9_1        | F      | 54  | Yes         | IM          | 135        | 0.4793        |
| IM9_2        | F      | 54  | Yes         | IM          | 164        | 0.4498        |
| Cancer1_1    | M      | 70  | No          | Cancer      | 119        | 3.2632        |
| Cancer1_2    | M      | 70  | No          | Cancer      | 104        | 3.7544        |
| Cancer2_1    | M      | 48  | No          | Cancer      | 85         | 3.629         |
| Cancer2_2    | M      | 48  | No          | Cancer      | 59         | 3.5095        |
| Cancer3_1    | F      | 61  | Yes         | Cancer      | 78         | 0.7841        |
| Cancer3_2    | F      | 61  | Yes         | Cancer      | 80         | 2.2833        |
| Cancer4_1    | M      | 56  | No          | Cancer      | 57         | 3.1189        |
| Cancer4_2    | M      | 56  | No          | Cancer      | 109        | 2.5765        |
| Cancer5_1    | F      | 49  | No          | Cancer      | 76         | 1.4901        |
| Cancer5_2    | F      | 49  | No          | Cancer      | 64         | 0.4897        |
| Cancer6_1    | M      | 36  | Yes         | Cancer      | 84         | 1.5837        |
| Cancer6_2    | M      | 36  | Yes         | Cancer      | 152        | 0.7406        |
| Cancer7_1    | M      | 54  | No          | Cancer      | 168        | 4.7575        |
| Cancer7_2    | M      | 54  | No          | Cancer      | 96         | 3.5625        |
| Gastritis1_E | M      | 59  | No          | Eradication | 159        | 4.5446        |
| Gastritis2_E | F      | 33  | No          | Eradication | 189        | 4.5516        |
| Gastritis3_E | F      | 47  | No          | Eradication | 188        | 4.9577        |
| Gastritis4_E | F      | 52  | Yes         | Eradication | 169        | 1.1708        |
| IM2_E        | F      | 61  | No          | Eradication | 154        | 4.3028        |
| IM3_E        | F      | 36  | No          | Eradication | 147        | 4.6894        |
| Gastritis6_E | F      | 54  | No          | Eradication | 153        | 4.6833        |
| IM5_E        | M      | 70  | No          | Eradication | 202        | 4.7769        |
| Gastritis7_E | F      | 58  | No          | Eradication | 146        | 4.7808        |
| Gastritis8_E | M      | 48  | No          | Eradication | 90         | 3.7961        |
| IM8_E        | F      | 56  | No          | Eradication | 145        | 4.8402        |

HP, *Helicobacter pylori*; IM, intestinal metaplasia; OTU, operational taxonomic unit

**Supplementary Table 2: Processing of sequencing reads**

| Experiment_ID | Removing adapters, Filtering and Trimming low quality reads |                    |                       |               |           |              |              |           |              |           |          | Merging paired-end reads |       | Reads filtering and trimming |  | Filtering chimeras |  | Final surviving |
|---------------|-------------------------------------------------------------|--------------------|-----------------------|---------------|-----------|--------------|--------------|-----------|--------------|-----------|----------|--------------------------|-------|------------------------------|--|--------------------|--|-----------------|
|               | # reads (paired)                                            | # paired surviving | paired surviving only | survived only | size only | sursize only | merged reads | %         | rimmed reads | %         | chimeras | %                        |       |                              |  |                    |  |                 |
| wk1043        | 265,975                                                     | 166,735            | 62.69                 | 55,317        | 20.80     | 6,548        | 2.46         | 122,789   | 73.64        | 89,973    | 73.27    | 88,714                   | 98.60 | 33.35                        |  |                    |  |                 |
| wk1053        | 295,704                                                     | 230,792            | 78.05                 | 34,615        | 11.71     | 7,364        | 2.49         | 203,751   | 88.28        | 187,853   | 92.20    | 186,482                  | 99.27 | 63.06                        |  |                    |  |                 |
| wk1061        | 235,106                                                     | 165,449            | 70.37                 | 39,298        | 16.72     | 5,157        | 2.19         | 141,930   | 85.79        | 129,184   | 91.02    | 128,410                  | 99.40 | 54.62                        |  |                    |  |                 |
| wk1062        | 171,961                                                     | 121,334            | 70.56                 | 29,143        | 16.95     | 3,433        | 2.00         | 106,399   | 87.69        | 99,626    | 93.63    | 99,025                   | 99.40 | 57.59                        |  |                    |  |                 |
| wk1123        | 140,648                                                     | 90,543             | 64.38                 | 27,199        | 19.34     | 3,667        | 2.61         | 66,624    | 73.58        | 49,980    | 75.02    | 49,523                   | 99.09 | 35.21                        |  |                    |  |                 |
| wk1154        | 278,047                                                     | 185,553            | 66.73                 | 54,560        | 19.62     | 5,577        | 2.01         | 135,689   | 73.13        | 125,743   | 92.67    | 125,347                  | 99.69 | 45.08                        |  |                    |  |                 |
| wk1155        | 207,590                                                     | 142,435            | 68.61                 | 35,728        | 17.21     | 4,875        | 2.35         | 101,236   | 71.08        | 94,913    | 93.75    | 94,598                   | 99.67 | 45.57                        |  |                    |  |                 |
| wk1163        | 235,130                                                     | 177,487            | 75.48                 | 31,574        | 13.43     | 5,378        | 2.29         | 155,541   | 87.64        | 144,657   | 93.00    | 137,706                  | 95.19 | 58.57                        |  |                    |  |                 |
| wk1201        | 229,972                                                     | 134,103            | 58.31                 | 53,936        | 23.45     | 4,743        | 2.06         | 95,290    | 71.06        | 75,597    | 79.33    | 75,097                   | 99.34 | 32.65                        |  |                    |  |                 |
| wk1202        | 165,285                                                     | 90,569             | 54.80                 | 46,330        | 28.03     | 2,472        | 1.50         | 66,726    | 73.67        | 55,456    | 83.11    | 55,182                   | 99.51 | 33.39                        |  |                    |  |                 |
| wk1213        | 240,516                                                     | 148,961            | 61.93                 | 49,496        | 20.58     | 6,618        | 2.75         | 104,514   | 70.16        | 75,202    | 71.95    | 73,938                   | 98.32 | 30.74                        |  |                    |  |                 |
| wk1221        | 314,709                                                     | 240,825            | 76.52                 | 42,140        | 13.39     | 7,284        | 2.31         | 214,454   | 89.05        | 200,074   | 93.29    | 199,545                  | 99.74 | 63.41                        |  |                    |  |                 |
| wk1222        | 306,554                                                     | 226,231            | 73.80                 | 47,441        | 15.48     | 6,440        | 2.10         | 199,634   | 88.24        | 184,615   | 92.48    | 184,067                  | 99.70 | 60.04                        |  |                    |  |                 |
| wk1241        | 244,063                                                     | 179,898            | 73.71                 | 36,669        | 15.02     | 5,224        | 2.14         | 158,435   | 88.07        | 148,270   | 93.58    | 141,214                  | 95.24 | 57.86                        |  |                    |  |                 |
| wk1242        | 257,396                                                     | 193,146            | 75.04                 | 36,080        | 14.02     | 5,766        | 2.24         | 170,078   | 88.06        | 158,568   | 93.23    | 151,114                  | 95.30 | 58.71                        |  |                    |  |                 |
| wk1263        | 119,201                                                     | 66,496             | 55.78                 | 31,896        | 26.76     | 1,807        | 1.52         | 49,235    | 74.04        | 41,898    | 85.10    | 41,724                   | 99.58 | 35.00                        |  |                    |  |                 |
| wk1264        | 270,250                                                     | 193,976            | 71.78                 | 44,295        | 16.39     | 6,068        | 2.25         | 164,491   | 84.80        | 152,270   | 92.57    | 151,697                  | 99.62 | 56.13                        |  |                    |  |                 |
| wk1265        | 252,737                                                     | 186,468            | 73.78                 | 34,451        | 13.63     | 6,969        | 2.76         | 159,412   | 85.49        | 148,463   | 93.13    | 147,814                  | 99.56 | 58.49                        |  |                    |  |                 |
| wk1293        | 220,101                                                     | 125,010            | 56.80                 | 53,469        | 24.29     | 4,307        | 1.96         | 87,451    | 69.96        | 40,847    | 46.71    | 40,378                   | 98.85 | 18.35                        |  |                    |  |                 |
| wk1303        | 233,519                                                     | 130,204            | 55.76                 | 64,676        | 27.70     | 3,292        | 1.41         | 98,040    | 75.30        | 78,911    | 80.49    | 78,558                   | 99.55 | 33.64                        |  |                    |  |                 |
| wk1313        | 263,741                                                     | 189,811            | 71.97                 | 42,620        | 16.16     | 5,418        | 2.05         | 165,804   | 87.35        | 155,474   | 93.77    | 155,138                  | 99.78 | 58.82                        |  |                    |  |                 |
| wk1394        | 237,449                                                     | 149,840            | 63.10                 | 46,426        | 19.55     | 6,778        | 2.85         | 107,376   | 71.66        | 77,541    | 72.21    | 77,205                   | 99.57 | 32.51                        |  |                    |  |                 |
| wk1395        | 145,422                                                     | 86,734             | 59.64                 | 36,628        | 25.19     | 2,544        | 1.75         | 65,759    | 75.82        | 56,889    | 86.51    | 56,587                   | 99.47 | 38.91                        |  |                    |  |                 |
| wk204         | 156,261                                                     | 93,719             | 59.98                 | 38,607        | 24.71     | 3,027        | 1.94         | 70,718    | 75.46        | 62,216    | 87.98    | 62,015                   | 99.68 | 39.69                        |  |                    |  |                 |
| wk205         | 51,486                                                      | 34,711             | 67.42                 | 9,147         | 17.77     | 1,418        | 2.75         | 26,249    | 75.62        | 22,980    | 87.55    | 22,865                   | 99.50 | 44.41                        |  |                    |  |                 |
| wk213         | 200,018                                                     | 130,488            | 65.24                 | 24,067        | 12.03     | 14,397       | 7.20         | 79,029    | 60.56        | 62,283    | 78.81    | 61,965                   | 99.49 | 30.98                        |  |                    |  |                 |
| wk263         | 212,761                                                     | 132,416            | 62.24                 | 29,294        | 13.77     | 10,653       | 5.01         | 93,842    | 70.87        | 88,056    | 93.83    | 79,099                   | 89.83 | 37.18                        |  |                    |  |                 |
| wk303         | 210,818                                                     | 159,146            | 75.49                 | 26,773        | 12.70     | 6,120        | 2.90         | 136,635   | 85.86        | 127,910   | 93.61    | 127,567                  | 99.73 | 60.51                        |  |                    |  |                 |
| wk354         | 324,118                                                     | 232,361            | 71.69                 | 55,563        | 17.14     | 6,107        | 1.88         | 203,620   | 87.63        | 189,859   | 93.24    | 189,333                  | 99.72 | 58.41                        |  |                    |  |                 |
| wk355         | 207,443                                                     | 144,658            | 69.73                 | 37,186        | 17.93     | 4,709        | 2.27         | 117,536   | 81.25        | 107,447   | 91.42    | 107,085                  | 99.66 | 58.24                        |  |                    |  |                 |
| wk423         | 180,281                                                     | 120,002            | 66.56                 | 16,329        | 9.06      | 18,615       | 10.33        | 69,064    | 57.55        | 51,759    | 74.94    | 50,909                   | 96.36 | 21.62                        |  |                    |  |                 |
| wk424         | 109,671                                                     | 20,910             | 19.07                 | 65,013        | 59.28     | 853          | 0.78         | 12,031    | 57.54        | 10,138    | 84.27    | 10,088                   | 99.51 | 9.20                         |  |                    |  |                 |
| wk425         | 203,211                                                     | 132,609            | 65.26                 | 42,227        | 20.78     | 4,184        | 2.06         | 92,013    | 69.39        | 60,569    | 65.83    | 58,542                   | 96.65 | 28.81                        |  |                    |  |                 |
| wk433         | 234,335                                                     | 161,117            | 68.75                 | 27,942        | 11.92     | 14,168       | 6.05         | 100,988   | 62.68        | 80,709    | 79.92    | 80,294                   | 99.49 | 34.26                        |  |                    |  |                 |
| wk441         | 304,561                                                     | 194,648            | 63.91                 | 57,672        | 18.94     | 8,270        | 2.72         | 147,470   | 75.76        | 115,172   | 78.10    | 113,015                  | 98.13 | 37.11                        |  |                    |  |                 |
| wk442         | 199,078                                                     | 126,633            | 63.61                 | 42,292        | 21.24     | 4,244        | 2.13         | 98,942    | 78.13        | 85,574    | 86.49    | 84,504                   | 98.75 | 42.45                        |  |                    |  |                 |
| wk473         | 201,106                                                     | 132,523            | 65.90                 | 24,423        | 12.14     | 13,697       | 6.81         | 84,146    | 63.50        | 65,085    | 77.35    | 64,171                   | 98.60 | 31.91                        |  |                    |  |                 |
| wk493         | 239,339                                                     | 180,959            | 75.61                 | 20,970        | 8.76      | 14,048       | 5.87         | 145,620   | 80.47        | 136,777   | 93.93    | 136,348                  | 99.69 | 56.97                        |  |                    |  |                 |
| wk523         | 248,445                                                     | 185,322            | 74.59                 | 31,340        | 12.61     | 7,666        | 3.09         | 155,725   | 84.03        | 145,118   | 93.19    | 144,421                  | 99.52 | 58.13                        |  |                    |  |                 |
| wk563         | 280,080                                                     | 179,471            | 64.08                 | 39,641        | 14.15     | 7,417        | 2.65         | 149,874   | 83.51        | 140,957   | 94.05    | 128,928                  | 91.47 | 46.03                        |  |                    |  |                 |
| wk583         | 110,260                                                     | 71,716             | 65.04                 | 21,709        | 19.69     | 2,749        | 2.49         | 53,443    | 74.52        | 47,251    | 88.41    | 46,979                   | 99.42 | 42.61                        |  |                    |  |                 |
| wk611         | 280,001                                                     | 167,124            | 59.69                 | 57,521        | 20.54     | 5,167        | 1.85         | 140,947   | 84.34        | 131,970   | 93.63    | 121,693                  | 92.21 | 43.46                        |  |                    |  |                 |
| wk612         | 210,104                                                     | 139,263            | 66.28                 | 44,342        | 21.10     | 4,329        | 2.06         | 117,481   | 84.36        | 109,522   | 93.23    | 108,404                  | 98.98 | 51.60                        |  |                    |  |                 |
| wk643         | 212,512                                                     | 142,044            | 66.84                 | 36,619        | 17.23     | 6,100        | 2.87         | 104,132   | 73.31        | 78,083    | 74.98    | 77,436                   | 99.17 | 36.44                        |  |                    |  |                 |
| wk671         | 295,579                                                     | 224,535            | 75.96                 | 38,758        | 13.11     | 7,504        | 2.54         | 197,228   | 87.84        | 185,163   | 93.88    | 183,909                  | 99.32 | 62.22                        |  |                    |  |                 |
| wk672         | 201,826                                                     | 117,308            | 58.12                 | 36,547        | 18.11     | 5,158        | 2.56         | 92,927    | 79.22        | 87,099    | 93.73    | 77,434                   | 88.90 | 38.37                        |  |                    |  |                 |
| wk723         | 208,815                                                     | 159,892            | 76.57                 | 26,341        | 12.61     | 5,045        | 2.42         | 140,299   | 87.75        | 131,112   | 93.45    | 130,795                  | 99.76 | 62.64                        |  |                    |  |                 |
| wk74          | 259,193                                                     | 156,259            | 60.29                 | 63,654        | 24.56     | 5,134        | 1.98         | 112,907   | 72.26        | 100,665   | 89.16    | 100,252                  | 99.59 | 38.68                        |  |                    |  |                 |
| wk75          | 219,938                                                     | 142,702            | 64.88                 | 43,404        | 19.73     | 5,422        | 2.47         | 105,051   | 73.62        | 92,080    | 87.65    | 91,489                   | 99.36 | 41.60                        |  |                    |  |                 |
| wk763         | 201,277                                                     | 132,937            | 66.05                 | 34,722        | 17.25     | 6,048        | 3.00         | 98,129    | 73.82        | 71,940    | 73.31    | 71,392                   | 99.24 | 35.47                        |  |                    |  |                 |
| wk813         | 193,677                                                     | 126,740            | 65.44                 | 37,997        | 19.62     | 4,451        | 2.30         | 95,512    | 75.36        | 69,191    | 72.44    | 68,465                   | 98.95 | 35.35                        |  |                    |  |                 |
| wk833         | 215,462                                                     | 161,167            | 74.80                 | 33,506        | 15.55     | 3,670        | 1.70         | 144,615   | 89.73        | 135,309   | 93.56    | 134,809                  | 99.63 | 62.57                        |  |                    |  |                 |
| wk863         | 270,245                                                     | 204,272            | 75.59                 | 37,650        | 13.93     | 5,760        | 2.13         | 176,678   | 86.49        | 160,948   | 91.10    | 159,514                  | 99.11 | 59.03                        |  |                    |  |                 |
| wk893         | 253,279                                                     | 175,473            | 69.28                 | 37,928        | 14.97     | 9,022        | 3.56         | 123,375   | 70.31        | 89,277    | 72.36    | 88,407                   | 99.03 | 34.90                        |  |                    |  |                 |
| wk903         | 224,345                                                     | 148,120            | 66.02                 | 41,877        | 18.67     | 6,026        | 2.69         | 111,008   | 74.95        | 92,517    | 83.34    | 91,824                   | 99.25 | 40.93                        |  |                    |  |                 |
| wk931         | 287,905                                                     | 179,160            | 62.23                 | 60,928        | 21.16     | 7,113        | 2.47         | 133,690   | 74.62        | 106,646   | 79.77    | 106,291                  | 99.67 | 36.92                        |  |                    |  |                 |
| wk932         | 136,049                                                     | 82,767             | 60.84                 | 32,957        | 24.22     | 2,514        | 1.85         | 63,340    | 76.53        | 54,707    | 86.37    | 54,439                   | 99.51 | 40.01                        |  |                    |  |                 |
| wk961         | 333,142                                                     | 253,698            | 76.15                 | 42,696        | 12.82     | 8,871        | 2.66         | 219,670   | 86.59        | 203,660   | 92.71    | 202,087                  | 99.23 | 60.66                        |  |                    |  |                 |
| wk962         | 258,623                                                     | 190,902            | 73.81                 | 38,993        | 15.08     | 5,622        | 2.17         | 166,263   | 87.09        | 154,668   | 93.03    | 153,281                  | 99.10 | 59.27                        |  |                    |  |                 |
| wk993         | 309,450                                                     | 203,633            | 65.80                 | 52,752        | 17.05     | 9,623        | 3.11         | 148,169   | 72.76        | 100,022   | 67.51    | 99,580                   | 99.56 | 32.18                        |  |                    |  |                 |
| Total         | 13,575,770                                                  | 9,164,005          | -                     | 2,383,374     | -         | 372,650      | -            | 7,269,024 | -            | 6,326,443 | -        | 6,228,692                | -     | -                            |  |                    |  |                 |
| Average       | 226,263                                                     | 152,733            | 66.47                 | 39,723        | 18.29     | 6,211        | 2.76         | 121,150   | 77.81        | 105,441   | 85.50    | 103,812                  | 98.50 | 44.54                        |  |                    |  |                 |
| sd            | 56,992                                                      | 47,797             | 8.74                  | 11,894        | 6.98      | 3,316        | 1.54         | 45,801    | 8.33         | 46,271    | 9.65     | 45,764                   | 2.37  | 12.65                        |  |                    |  |                 |

**Supplementary Table 3: The PERMANOVA results of different group comparisons**

| <b>Feature</b>                                   | <b>Jensena Shannon</b> | <b>Bray Curtis</b> | <b>Weighted unifrac</b> | <b>Unweighted unifrac</b> |
|--------------------------------------------------|------------------------|--------------------|-------------------------|---------------------------|
| Gender                                           | 0.0658                 | 0.0896             | 0.1256                  | 0.2082                    |
| Age                                              | 0.7229                 | 0.7957             | 0.8236                  | 0.9414                    |
| Helicobacter_pylori_state                        | 0.0005                 | 0.0008             | 0.0008                  | 0.0019                    |
| Disease (Normal vs. Gastritis vs. IM vs. Cancer) | 0.0005                 | 0.0011             | 0.0012                  | 0.0008                    |
| Antrum vs. Corpus                                | 0.9817                 | 0.9794             | 0.9366                  | 0.9414                    |
| Tumor vs. Adjacent tissue                        | 0.9817                 | 0.9794             | 0.9366                  | 0.9414                    |
| NAD vs. Gastritis                                | 0.0012                 | 0.0012             | 0.0012                  | 0.0141                    |
| NAD vs. IM                                       | 0.0377                 | 0.0360             | 0.0437                  | 0.1700                    |
| NAD vs. Cancer                                   | 0.3468                 | 0.5004             | 0.4420                  | 0.0087                    |
| Gastritis vs. IM                                 | 0.1212                 | 0.1224             | 0.1296                  | 0.5041                    |
| Gastritis vs. Cancer                             | 0.0035                 | 0.0029             | 0.0067                  | 0.0050                    |
| IM vs. Cancer                                    | 0.0462                 | 0.0866             | 0.1296                  | 0.0011                    |

## Supplementary Figure 1: Rarefaction curves

A: Rarefaction curves of observed species number;

B: Rarefaction curves of Chao 1 index.

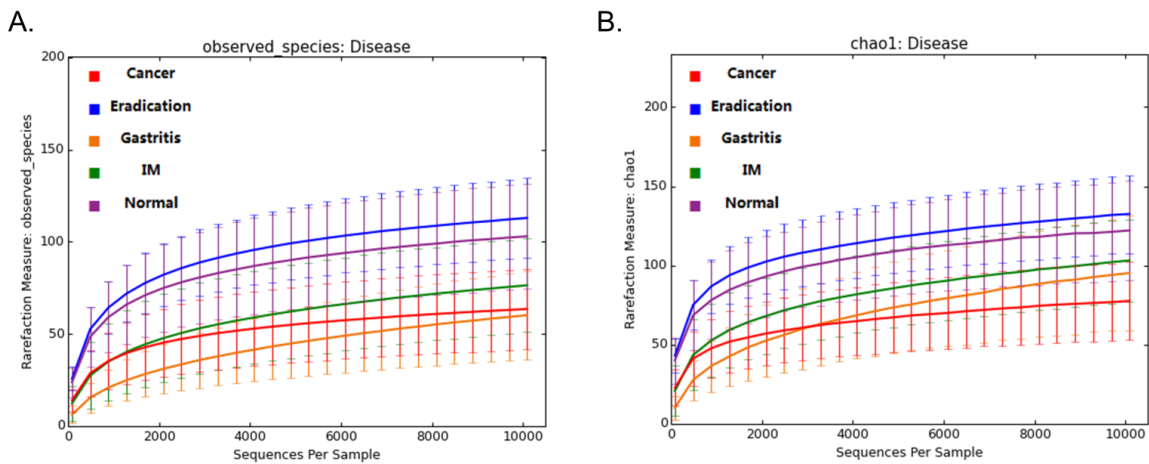

Each line represents one histological group. Colors indicate different groups. The sampling started from 88 sequences per sample, with step of 400 sequences, ended at 10,088 sequences per sample. Every step was repeated 1,000 times.

Supplementary Figure 2: Bar-plot of major phyla and major genera.

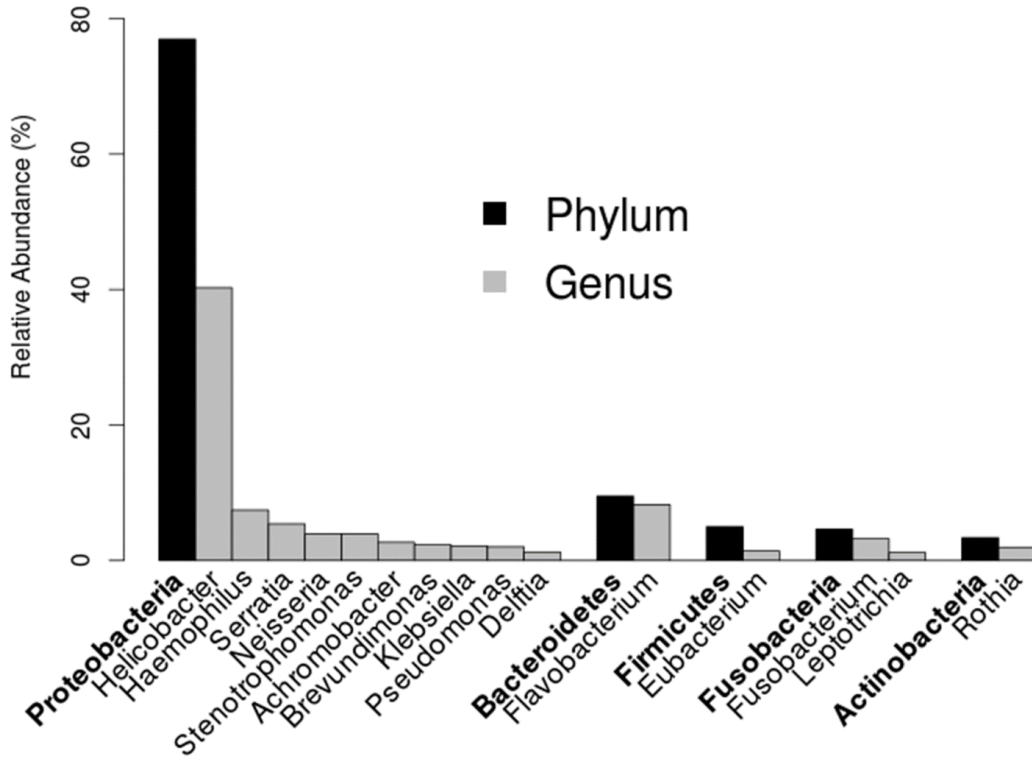

The phyla and genera were sorted by the decreasing order of relative abundance. Only taxa with relative abundance >1% were showed.

**Supplementary Figure 3: Relative abundance distribution of major phyla across 60 samples.**

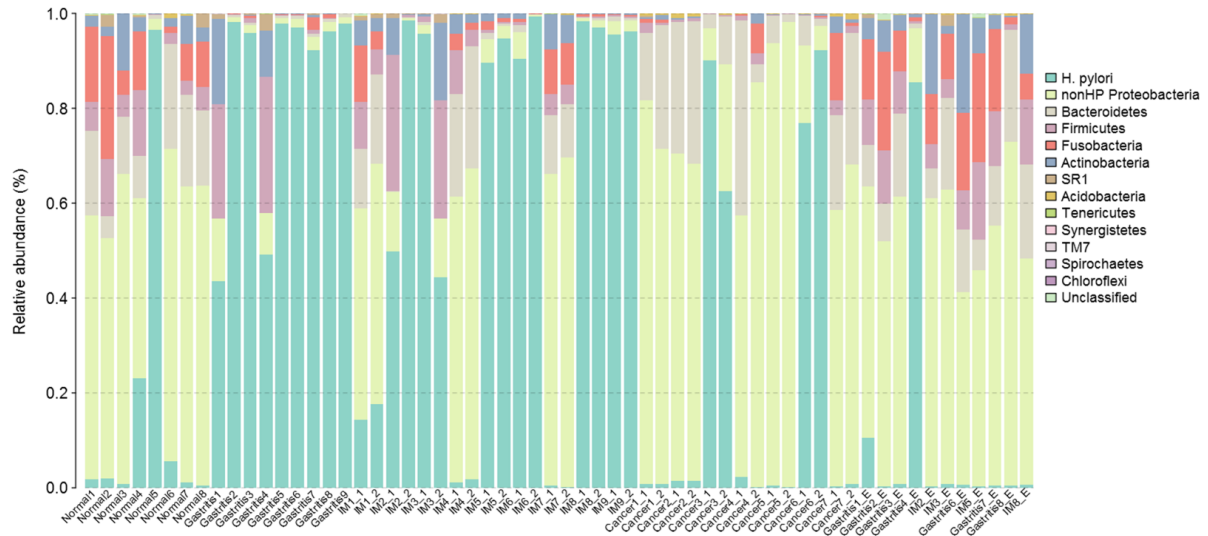

The phyla were sorted according to the decreasing order of the average relative abundance. All detected phyla were showed and *Proteobacteria* was divided into *H. pylori* and non-HP *Proteobacteria*. Genera were sorted by the decreasing order of average relative abundance. Samples were ordered by their histological information. Sample names have the same meaning with Figure 1A.

Supplementary Figure 4: Principle coordinate analysis (PCoA) based on OTUs relative abundance profile without HP OTUs.

## PCoA after excluding HP OTUs

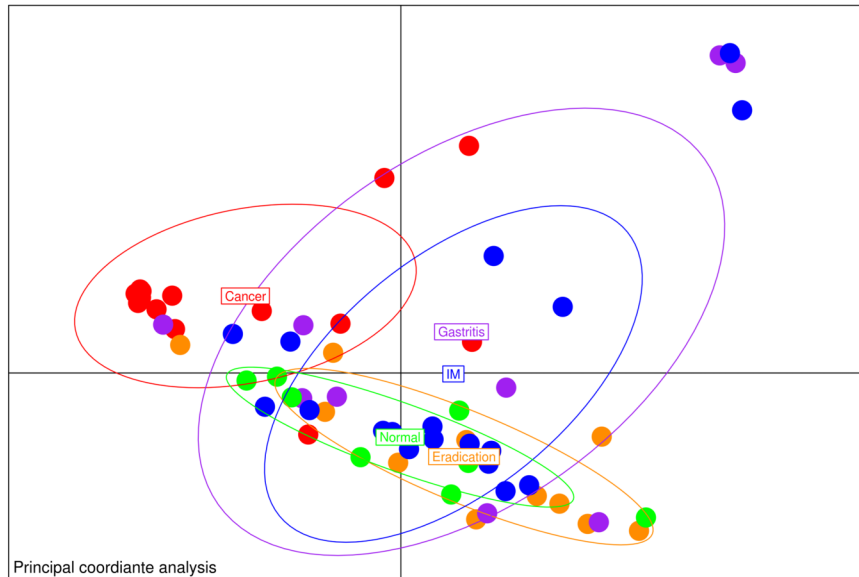

The variance explained by PC1 and PC2 are 30.6% and 15.3%, respectively. The distance was measured by root Jensen-Shannon divergence (rJSD). Points represent samples, and the color indicates histological group.



**Supplementary Figure 5: The dendrograms of hierarchical clustering results.**

- A. Rooted Jensen-Shannon divergence distance;
- B. Bray-Curtis dissimilarity;
- C. Weighted unifrac distance;
- D. Unweighted unifrac distance

## Dendrograms with HP OTUs

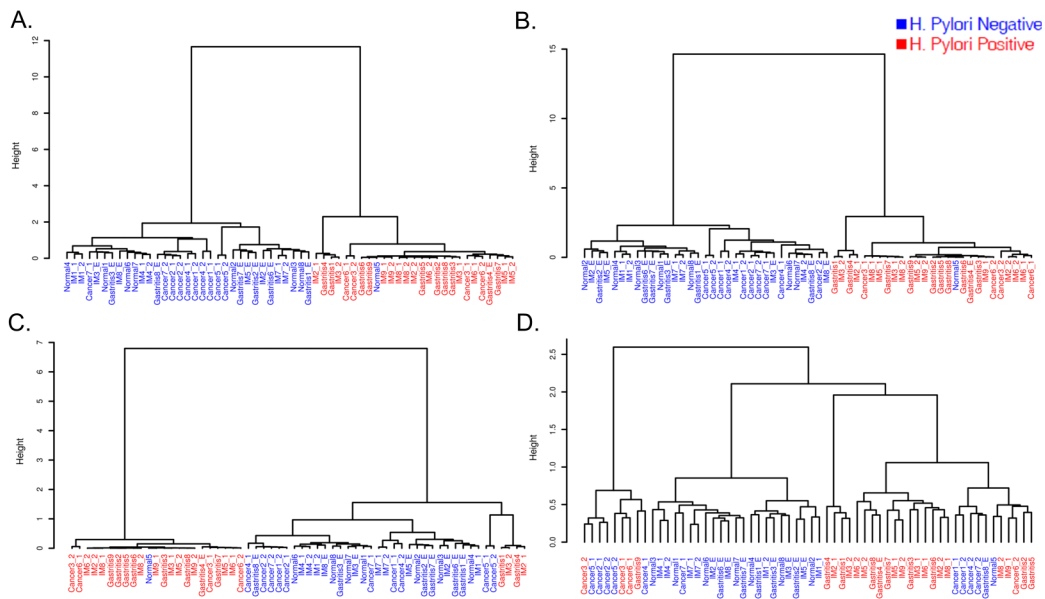

The clustering method for hierarchical clustering was *ward*. Sample names indicates their histological information and colored by HP state, red—HP positive, blue—HP negative.

**Supplementary Figure 6: The dendrograms of hierarchical clustering results (excluding HP OTUs).**

- A. Rooted Jensen-Shannon divergence distance;
- B. Bray-Curtis dissimilarity;
- C. Weighted unifracs distance;
- D. Unweighted unifracs distance;

## Dendrograms without HP OTUs

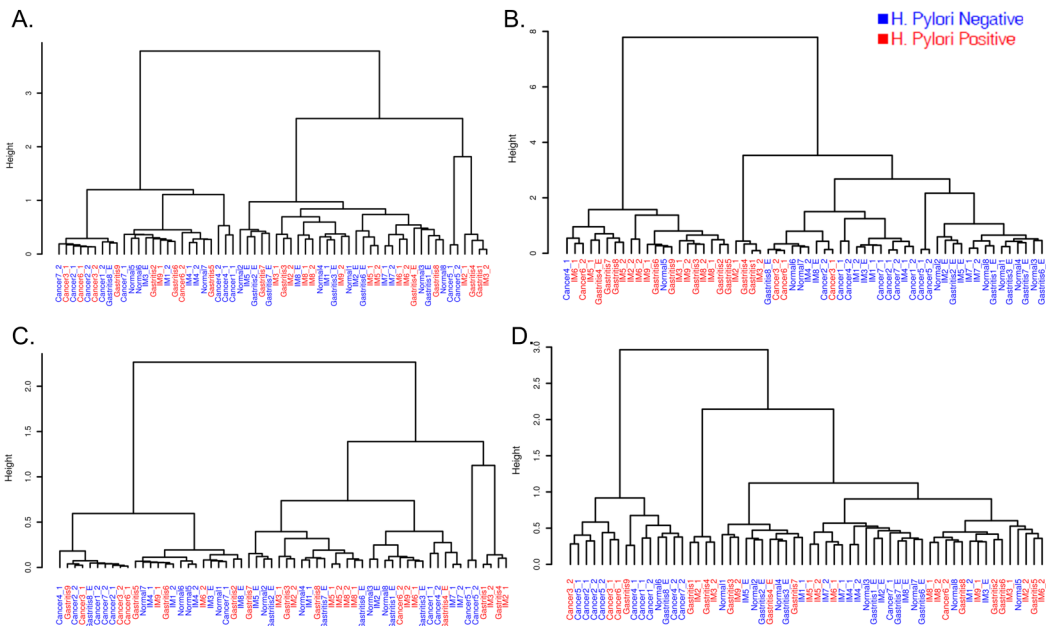

The clustering method for hierarchical clustering was *ward*. Sample names indicate their histological information and colored by HP state, red—HP positive, blue—HP negative.

**Supplementary figure 7: The OTUs significantly enriched in different histological groups.**

G1: Normal, G2: HP Gastritis, G3: Gastric IM, G4: Gastric Cancer.

OTUs were sorted by enriched groups and decreasing order of logarithmic LDA score. The right shows the taxonomic results of RDP classifier unless noted. The phylum column was colored according to the phylum name. Only the top 96 high abundance OTUs with LDA score >3.0 were shown.

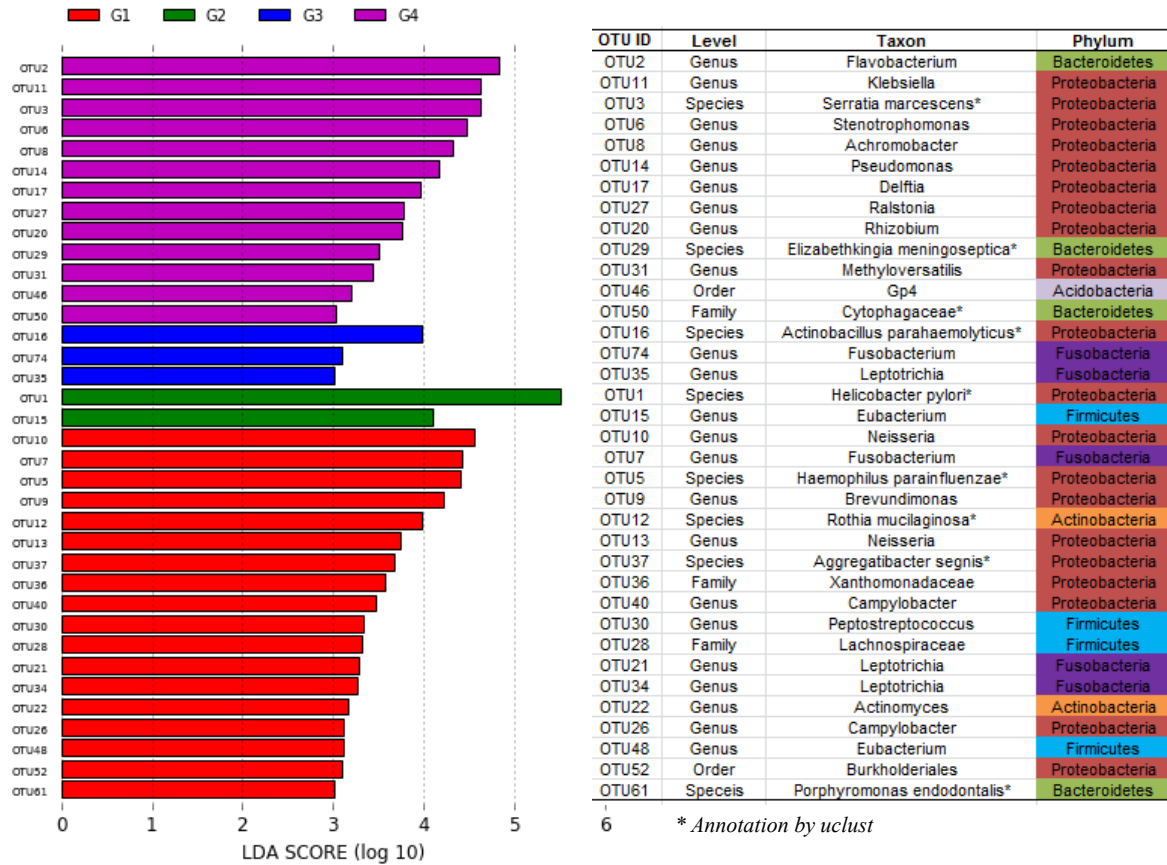

Supplement: srep44935-s1.pdf [file srep44935-s1.pdf]
